# Supplementary material for: The effect of asymmetric external reorganization energy on electron and hole transport in organic semiconductors
Source: Royal Society of Chemistry journal article supplement (doi:10.1039/d0cp06686a), 2021-01-01
Supplement: d0cp06686a1.pdf [file d0cp06686a1.pdf]

## Supporting Information:

### Effect of Asymmetric External Reorganization Energy on Electron and Hole Transport in Organic Semiconductors

Tao Xu, Kangying Cao, Changwei Wang and Shiwei Yin\*

Key Laboratory for Macromolecular Science of Shaanxi Province, School of Chemistry and Chemical Engineering, Shaanxi Normal University, Xi'an City 710119, People's Republic of China

#### Index

|                                                                                                                                                             |   |
|-------------------------------------------------------------------------------------------------------------------------------------------------------------|---|
| Table S1 The detailed SS-PFF parameters for molecules NAP, PEP, PFN and PFP. ....                                                                           | 1 |
| Table S2. The electron couplings for ET and HT reactions based on the optimized neutral supercells and containing electron/hole supercells. ....            | 6 |
| Table S3. Electron-vibration couplings for some significant vibrations whose $\lambda_i > 5\text{cm}^{-1}$ during ET and HT processes in NAP molecule. .... | 7 |
| Table S4. Electron-vibration couplings for some significant vibrations whose $\lambda_i > 5\text{cm}^{-1}$ during ET and HT processes in PEN molecule. .... | 8 |
| Table S5. Electron-vibration couplings for some significant vibrations whose $\lambda_i > 5\text{cm}^{-1}$ during ET and HT processes in PFN molecule. .... | 8 |
| Table S6. Electron-vibration couplings for some significant vibrations whose $\lambda_i > 5\text{cm}^{-1}$ during ET and HT processes in PFP molecule. .... | 8 |
| Table S7. The effective vibration frequency and its Huang-Ryhs factors for ET and HT reactions under the one-mode approximation. ....                       | 9 |
| Table S8. The reorganization energies including internal and external contributions for different CT channels. ....                                         | 9 |

**Table S1** The detailed SS-PFF parameters for molecules NAP, PEP, PFN and PFP.

---

|  | anion | cation | neutral |
|--|-------|--------|---------|
|--|-------|--------|---------|

---

| NAP                |   |                                                                                      |                  |                   |            |            |            |        |  |
|--------------------|---|--------------------------------------------------------------------------------------|------------------|-------------------|------------|------------|------------|--------|--|
|                    |   | 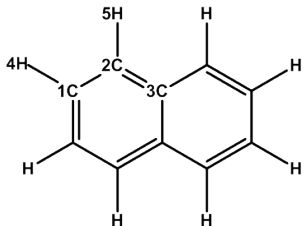   |                  |                   |            |            |            |        |  |
| bond stretching    |   | $k_b$                                                                                | $b_0$            | $k_b$             | $b_0$      | $k_b$      | $b_0$      |        |  |
| 1                  | 2 | 392.3                                                                                | 1.4083           | 399.3             | 1.4036     | 487.7      | 1.3734     |        |  |
| 1                  | 1 | 452.2                                                                                | 1.3881           | 446.4             | 1.3892     | 396.8      | 1.4144     |        |  |
| 1                  | 4 | 385.4                                                                                | 1.0880           | 405.8             | 1.0830     | 399.1      | 1.0842     |        |  |
| 2                  | 3 | 372.0                                                                                | 1.4202           | 387.6             | 1.4116     | 393.7      | 1.4195     |        |  |
| 2                  | 5 | 385.4                                                                                | 1.0880           | 402.4             | 1.0844     | 397.5      | 1.0848     |        |  |
| 3                  | 3 | 285.6                                                                                | 1.4520           | 319.7             | 1.4299     | 313.5      | 1.4312     |        |  |
| angle bending      |   | $k_\theta$                                                                           | $\theta_0$       | $k_\theta$        | $\theta_0$ | $k_\theta$ | $\theta_0$ |        |  |
| 1                  | 1 | 2                                                                                    | 24.06            | 120.09            | 24.44      | 120.17     | 25.06      | 120.30 |  |
| 2                  | 3 | 3                                                                                    | 24.13            | 118.33            | 24.45      | 118.01     | 24.91      | 118.83 |  |
| 4                  | 1 | 2                                                                                    | 24.33            | 119.73            | 25.80      | 119.62     | 25.46      | 120.13 |  |
| 2                  | 3 | 2                                                                                    | 31.04            | 123.33            | 30.62      | 121.98     | 31.09      | 122.34 |  |
| 1                  | 2 | 3                                                                                    | 24.44            | 121.58            | 24.80      | 120.83     | 25.70      | 120.87 |  |
| 4                  | 1 | 1                                                                                    | 24.57            | 120.18            | 25.68      | 120.22     | 25.41      | 119.58 |  |
| 1                  | 2 | 5                                                                                    | 24.64            | 119.96            | 25.77      | 119.75     | 25.46      | 120.43 |  |
| 5                  | 2 | 3                                                                                    | 24.97            | 118.47            | 25.75      | 119.43     | 25.63      | 118.71 |  |
| torsional rotation |   | $k_\phi$ -anion                                                                      | $k_\phi$ -cation | $k_\phi$ -neutral | $\gamma$   | n          |            |        |  |
| 1                  | 1 | 2                                                                                    | 3                | 0.542             | 0.618      | 0.675      | 180.0      | 2      |  |
| 1                  | 1 | 2                                                                                    | 5                | 0.494             | 0.550      | 0.628      | 180.0      | 2      |  |
| 4                  | 1 | 2                                                                                    | 3                | 0.466             | 0.642      | 0.670      | 180.0      | 2      |  |
| 4                  | 1 | 2                                                                                    | 5                | 0.452             | 0.715      | 0.705      | 180.0      | 2      |  |
| 2                  | 1 | 1                                                                                    | 4                | 0.554             | 0.632      | 0.610      | 180.0      | 2      |  |
| 2                  | 1 | 1                                                                                    | 2                | 0.654             | 0.595      | 0.690      | 180.0      | 2      |  |
| 4                  | 1 | 1                                                                                    | 4                | 0.509             | 0.764      | 0.660      | 180.0      | 2      |  |
| 1                  | 2 | 3                                                                                    | 2                | 0.402             | 0.449      | 0.468      | 180.0      | 2      |  |
| 1                  | 2 | 3                                                                                    | 3                | 0.399             | 0.513      | 0.538      | 180.0      | 2      |  |
| 5                  | 2 | 3                                                                                    | 2                | 0.472             | 0.540      | 0.554      | 180.0      | 2      |  |
| 5                  | 2 | 3                                                                                    | 3                | 0.434             | 0.535      | 0.522      | 180.0      | 2      |  |
| 2                  | 3 | 3                                                                                    | 2                | 0.325             | 0.319      | 0.361      | 180.0      | 2      |  |
| PFN                |   |                                                                                      |                  |                   |            |            |            |        |  |
|                    |   |  |                  |                   |            |            |            |        |  |
| bond               |   | $k_b$                                                                                | $b_0$            | $k_b$             | $b_0$      | $k_b$      | $b_0$      |        |  |

| stretching         |   |       |        |                 |                  |                   |            |            |            |
|--------------------|---|-------|--------|-----------------|------------------|-------------------|------------|------------|------------|
| 2                  | 3 | 390.6 | 1.4108 | 397.9           | 1.4123           | 404.3             | 1.4170     |            |            |
| 3                  | 3 | 279.0 | 1.4604 | 312.8           | 1.4371           | 306.1             | 1.4394     |            |            |
| 1                  | 2 | 403.4 | 1.4032 | 408.6           | 1.4042           | 494.0             | 1.3712     |            |            |
| 2                  | 5 | 418.1 | 1.3658 | 533.9           | 1.3087           | 477.9             | 1.3366     |            |            |
| 1                  | 1 | 479.8 | 1.3748 | 451.2           | 1.3883           | 414.0             | 1.4068     |            |            |
| 1                  | 4 | 432.8 | 1.3575 | 538.2           | 1.3101           | 488.5             | 1.3331     |            |            |
| angle bending      |   |       |        | $k_\theta$      | $\theta_0$       | $k_\theta$        | $\theta_0$ | $k_\theta$ | $\theta_0$ |
| 2                  | 3 | 2     | 35.83  | 124.45          | 35.93            | 122.69            | 37.39      | 122.89     |            |
| 2                  | 3 | 3     | 24.35  | 117.78          | 24.80            | 118.65            | 25.63      | 118.56     |            |
| 1                  | 2 | 3     | 24.95  | 122.29          | 25.29            | 121.37            | 26.19      | 121.06     |            |
| 3                  | 2 | 5     | 41.64  | 120.86          | 43.36            | 121.22            | 43.21      | 120.76     |            |
| 1                  | 2 | 5     | 42.51  | 116.85          | 44.58            | 117.41            | 44.55      | 118.19     |            |
| 1                  | 1 | 2     | 24.88  | 119.94          | 25.18            | 119.98            | 25.89      | 120.39     |            |
| 2                  | 1 | 4     | 38.03  | 119.56          | 38.43            | 119.57            | 38.99      | 120.73     |            |
| 1                  | 1 | 4     | 37.64  | 120.50          | 38.07            | 120.46            | 38.61      | 118.89     |            |
| torsional rotation |   |       |        | $k_\phi$ -anion | $k_\phi$ -cation | $k_\phi$ -neutral | $\gamma$   | n          |            |
| 1                  | 2 | 3     | 2      | 0.327           | 0.418            | 0.428             | 180.0      | 2          |            |
| 5                  | 2 | 3     | 2      | 0.396           | 0.609            | 0.592             | 180.0      | 2          |            |
| 1                  | 2 | 3     | 3      | 0.257           | 0.375            | 0.394             | 180.0      | 2          |            |
| 5                  | 2 | 3     | 3      | 0.385           | 0.646            | 0.610             | 180.0      | 2          |            |
| 2                  | 3 | 3     | 2      | 0.271           | 0.281            | 0.316             | 180.0      | 2          |            |
| 1                  | 1 | 2     | 3      | 0.362           | 0.464            | 0.491             | 180.0      | 2          |            |
| 4                  | 1 | 2     | 3      | 0.419           | 0.718            | 0.745             | 180.0      | 2          |            |
| 1                  | 1 | 2     | 5      | 0.417           | 0.622            | 0.663             | 180.0      | 2          |            |
| 4                  | 1 | 2     | 5      | 0.329           | 0.941            | 0.956             | 180.0      | 2          |            |
| 2                  | 1 | 1     | 4      | 0.539           | 0.705            | 0.663             | 180.0      | 2          |            |
| 2                  | 1 | 1     | 2      | 0.461           | 0.427            | 0.489             | 180.0      | 2          |            |
| 4                  | 1 | 1     | 4      | 0.707           | 0.982            | 0.841             | 180.0      | 2          |            |
| PEN                |   |       |        |                 |                  |                   |            |            |            |
|                    |   |       |        |                 |                  |                   |            |            |            |
| bond stretching    |   |       |        | $k_b$           | $b_0$            | $k_b$             | $b_0$      | $k_b$      | $b_0$      |
| 1                  | 0 | 6     | 391.3  | 1.0861          | 402.6            | 1.0831            | 398.3      | 1.0842     |            |
| 2                  | 1 |       | 406.5  | 1.4071          | 410.3            | 1.4044            | 424.3      | 1.4004     |            |
| 2                  | 2 |       | 275.1  | 1.4613          | 285.6            | 1.4530            | 282.3      | 1.4553     |            |
| 2                  | 3 |       | 406.5  | 1.4072          | 414.9            | 1.4035            | 399.4      | 1.4132     |            |
| 3                  | 4 |       | 416.7  | 1.4022          | 417.4            | 1.4007            | 455.5      | 1.3861     |            |

|                    |   |       |            |                 |                  |                   |            |            |
|--------------------|---|-------|------------|-----------------|------------------|-------------------|------------|------------|
| 4                  | 4 | 288.2 | 1.4492     | 292.5           | 1.4457           | 282.8             | 1.4530     |            |
| 4                  | 5 | 381.1 | 1.4238     | 386.4           | 1.4217           | 366.3             | 1.4351     |            |
| 5                  | 6 | 473.3 | 1.3766     | 480.7           | 1.3729           | 516.8             | 1.3617     |            |
| 6                  | 6 | 386.7 | 1.4168     | 385.8           | 1.4176           | 364.3             | 1.4317     |            |
| 7                  | 1 | 387.4 | 1.0871     | 398.0           | 1.0843           | 394.2             | 1.0856     |            |
| 8                  | 3 | 387.1 | 1.0878     | 398.0           | 1.0851           | 394.0             | 1.0856     |            |
| 9                  | 5 | 388.8 | 1.0872     | 400.2           | 1.0840           | 395.9             | 1.0852     |            |
| angle bending      |   |       | $k_\theta$ | $\theta_0$      | $k_\theta$       | $\theta_0$        | $k_\theta$ | $\theta_0$ |
| 1                  | 2 | 2     | 23.85      | 119.10          | 23.65            | 118.57            | 24.03      | 119.02     |
| 3                  | 2 | 1     | 30.02      | 121.87          | 30.15            | 122.99            | 30.25      | 122.28     |
| 1                  | 6 | 5     | 25.66      | 120.03          | 25.00            | 120.21            | 25.36      | 120.22     |
| 1                  | 6 | 6     | 25.65      | 119.35          | 24.95            | 119.73            | 25.28      | 119.22     |
| 2                  | 1 | 2     | 24.94      | 121.81          | 24.93            | 122.89            | 25.38      | 121.95     |
| 3                  | 2 | 2     | 24.02      | 119.04          | 23.63            | 118.45            | 24.01      | 118.70     |
| 4                  | 3 | 2     | 25.07      | 121.69          | 25.11            | 122.72            | 25.40      | 121.95     |
| 8                  | 3 | 2     | 25.82      | 119.13          | 25.39            | 118.50            | 25.64      | 118.72     |
| 3                  | 4 | 4     | 23.99      | 119.27          | 23.94            | 118.84            | 24.11      | 119.36     |
| 5                  | 4 | 3     | 30.69      | 121.91          | 30.35            | 122.93            | 30.51      | 122.28     |
| 4                  | 4 | 5     | 24.66      | 118.83          | 24.19            | 118.24            | 24.31      | 118.37     |
| 6                  | 5 | 4     | 25.40      | 120.55          | 25.45            | 121.71            | 25.47      | 121.07     |
| 5                  | 6 | 6     | 24.52      | 120.63          | 24.63            | 120.06            | 24.48      | 120.56     |
| 7                  | 1 | 2     | 25.75      | 119.09          | 25.34            | 118.57            | 25.65      | 119.03     |
| 8                  | 3 | 4     | 25.85      | 119.19          | 25.36            | 118.79            | 25.65      | 119.34     |
| 9                  | 5 | 4     | 25.82      | 118.95          | 25.42            | 118.18            | 25.56      | 118.36     |
| 9                  | 5 | 6     | 25.75      | 120.51          | 25.21            | 120.12            | 25.42      | 120.57     |
| torsional rotation |   |       |            | $k_\phi$ -anion | $k_\phi$ -cation | $k_\phi$ -neutral | $\gamma$   | n          |
| 1                  | 2 | 2     | 1          | 0.368           | 0.366            | 0.384             | 180.0      | 2          |
| 1                  | 2 | 2     | 3          | 0.327           | 0.325            | 0.338             | 180.0      | 2          |
| 1                  | 2 | 3     | 4          | 0.444           | 0.449            | 0.446             | 180.0      | 2          |
| 1                  | 2 | 3     | 8          | 0.521           | 0.537            | 0.533             | 180.0      | 2          |
| 10                 | 6 | 5     | 4          | 0.615           | 0.675            | 0.677             | 180.0      | 2          |
| 10                 | 6 | 5     | 9          | 0.625           | 0.742            | 0.718             | 180.0      | 2          |
| 10                 | 6 | 6     | 5          | 0.563           | 0.614            | 0.577             | 180.0      | 2          |
| 10                 | 6 | 6     | 10         | 0.560           | 0.710            | 0.634             | 180.0      | 2          |
| 2                  | 2 | 1     | 2          | 0.404           | 0.485            | 0.481             | 180.0      | 2          |
| 2                  | 2 | 1     | 7          | 0.450           | 0.497            | 0.489             | 180.0      | 2          |
| 2                  | 3 | 4     | 4          | 0.441           | 0.478            | 0.486             | 180.0      | 2          |
| 2                  | 2 | 3     | 4          | 0.417           | 0.490            | 0.479             | 180.0      | 2          |
| 2                  | 3 | 4     | 5          | 0.436           | 0.482            | 0.493             | 180.0      | 2          |
| 2                  | 2 | 3     | 8          | 0.455           | 0.508            | 0.480             | 180.0      | 2          |
| 2                  | 2 | 1     | 2          | 0.402           | 0.483            | 0.479             | 180.0      | 2          |

|   |   |   |   |       |       |       |       |   |
|---|---|---|---|-------|-------|-------|-------|---|
| 3 | 2 | 1 | 2 | 0.426 | 0.465 | 0.468 | 180.0 | 2 |
| 3 | 2 | 1 | 7 | 0.504 | 0.545 | 0.545 | 180.0 | 2 |
| 3 | 2 | 2 | 3 | 0.353 | 0.389 | 0.378 | 180.0 | 2 |
| 3 | 4 | 4 | 3 | 0.396 | 0.361 | 0.392 | 180.0 | 2 |
| 3 | 4 | 4 | 5 | 0.334 | 0.343 | 0.342 | 180.0 | 2 |
| 3 | 4 | 5 | 6 | 0.460 | 0.431 | 0.431 | 180.0 | 2 |
| 3 | 4 | 5 | 9 | 0.531 | 0.543 | 0.532 | 180.0 | 2 |
| 4 | 4 | 3 | 8 | 0.472 | 0.499 | 0.507 | 180.0 | 2 |
| 4 | 5 | 6 | 6 | 0.648 | 0.638 | 0.650 | 180.0 | 2 |
| 4 | 4 | 5 | 6 | 0.492 | 0.521 | 0.512 | 180.0 | 2 |
| 4 | 4 | 5 | 9 | 0.486 | 0.530 | 0.492 | 180.0 | 2 |
| 5 | 4 | 3 | 8 | 0.509 | 0.568 | 0.566 | 180.0 | 2 |
| 5 | 4 | 4 | 5 | 0.368 | 0.413 | 0.384 | 180.0 | 2 |
| 5 | 6 | 6 | 5 | 0.674 | 0.649 | 0.665 | 180.0 | 2 |
| 5 | 4 | 3 | 8 | 0.508 | 0.568 | 0.566 | 180.0 | 2 |
| 6 | 5 | 4 | 3 | 0.462 | 0.432 | 0.432 | 180.0 | 2 |
| 6 | 6 | 5 | 9 | 0.602 | 0.619 | 0.627 | 180.0 | 2 |

PFP

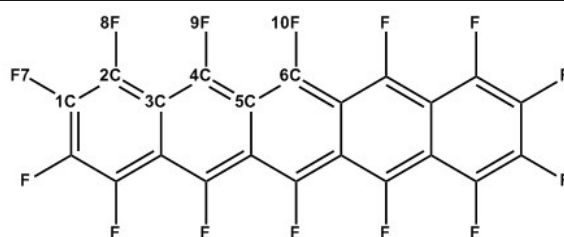

| bond stretching |    | $k_b$      | $b_0$      | $k_b$      | $b_0$      | $k_b$      | $b_0$      |
|-----------------|----|------------|------------|------------|------------|------------|------------|
| 1               | 7  | 456.6      | 1.3472     | 519.2      | 1.3182     | 488.7      | 1.3325     |
| 2               | 8  | 451.2      | 1.3473     | 501.1      | 1.3244     | 477.8      | 1.3360     |
| 4               | 9  | 433.0      | 1.3538     | 496.6      | 1.3222     | 467.5      | 1.3373     |
| 6               | 10 | 430.3      | 1.3552     | 501.0      | 1.3194     | 469.0      | 1.3358     |
| 1               | 2  | 491.5      | 1.3703     | 475.3      | 1.3773     | 523.5      | 1.3602     |
| 2               | 3  | 394.4      | 1.4223     | 400.9      | 1.4191     | 379.8      | 1.4333     |
| 1               | 1  | 410.4      | 1.4066     | 407.9      | 1.4093     | 387.4      | 1.4222     |
| 3               | 4  | 433.3      | 1.4011     | 427.4      | 1.4046     | 467.6      | 1.3875     |
| 3               | 3  | 294.4      | 1.4516     | 300.3      | 1.4475     | 289.7      | 1.4559     |
| 4               | 5  | 426.6      | 1.4055     | 426.6      | 1.4064     | 414.9      | 1.4148     |
| 5               | 6  | 424.7      | 1.4062     | 422.2      | 1.4080     | 438.4      | 1.4025     |
| 5               | 5  | 293.0      | 1.4580     | 299.8      | 1.4530     | 298.9      | 1.4530     |
| angle bending   |    | $k_\theta$ | $\theta_0$ | $k_\theta$ | $\theta_0$ | $k_\theta$ | $\theta_0$ |
| 1               | 2  | 46.33      | 117.17     | 45.92      | 117.97     | 45.94      | 118.27     |
| 3               | 2  | 44.40      | 121.21     | 44.19      | 121.32     | 44.07      | 120.72     |
| 1               | 2  | 26.05      | 121.63     | 25.88      | 120.72     | 25.98      | 121.02     |
| 2               | 1  | 39.00      | 120.79     | 39.19      | 120.52     | 39.24      | 121.13     |
| 1               | 1  | 38.44      | 118.90     | 38.82      | 118.90     | 38.80      | 118.13     |

| 1                  | 1 | 2  | 25.56 | 120.31            | 25.45              | 120.58              | 25.41    | 120.74 |
|--------------------|---|----|-------|-------------------|--------------------|---------------------|----------|--------|
| 2                  | 3 | 4  | 39.09 | 123.88            | 39.69              | 122.67              | 39.65    | 123.08 |
| 2                  | 3 | 3  | 25.58 | 118.07            | 26.06              | 118.71              | 25.80    | 118.25 |
| 3                  | 3 | 4  | 25.76 | 118.07            | 25.84              | 118.63              | 26.04    | 118.68 |
| 3                  | 4 | 9  | 53.66 | 117.29            | 54.33              | 118.20              | 54.59    | 118.49 |
| 5                  | 4 | 9  | 53.03 | 118.60            | 53.96              | 118.89              | 54.04    | 118.32 |
| 3                  | 4 | 5  | 26.07 | 124.12            | 26.11              | 122.91              | 26.42    | 123.19 |
| 4                  | 5 | 6  | 41.25 | 124.30            | 41.52              | 123.01              | 42.27    | 123.40 |
| 4                  | 5 | 5  | 25.96 | 117.82            | 26.46              | 118.46              | 26.69    | 118.14 |
| 5                  | 5 | 6  | 26.08 | 117.88            | 26.37              | 118.54              | 26.77    | 118.47 |
| 5                  | 6 | 10 | 54.25 | 117.88            | 55.48              | 118.54              | 55.70    | 118.47 |
| 5                  | 6 | 5  | 25.89 | 124.24            | 26.09              | 122.92              | 26.47    | 123.06 |
| torsional rotation |   |    |       | $k_{\phi}$ -anion | $k_{\phi}$ -cation | $k_{\phi}$ -neutral | $\gamma$ | n      |
| 7                  | 1 | 2  | 8     | 0.847             | 0.981              | 0.975               | 180.0    | 2      |
| 1                  | 1 | 2  | 8     | 0.609             | 0.639              | 0.641               | 180.0    | 2      |
| 7                  | 1 | 2  | 3     | 0.676             | 0.750              | 0.752               | 180.0    | 2      |
| 1                  | 1 | 2  | 3     | 0.462             | 0.449              | 0.451               | 180.0    | 2      |
| 8                  | 2 | 3  | 3     | 0.554             | 0.615              | 0.556               | 180.0    | 2      |
| 8                  | 2 | 3  | 4     | 0.532             | 0.580              | 0.544               | 180.0    | 2      |
| 1                  | 2 | 3  | 3     | 0.347             | 0.369              | 0.357               | 180.0    | 2      |
| 1                  | 2 | 3  | 4     | 0.400             | 0.385              | 0.377               | 180.0    | 2      |
| 7                  | 1 | 1  | 7     | 0.699             | 0.901              | 0.769               | 180.0    | 2      |
| 2                  | 1 | 1  | 7     | 0.585             | 0.675              | 0.616               | 180.0    | 2      |
| 2                  | 1 | 1  | 2     | 0.465             | 0.449              | 0.453               | 180.0    | 2      |
| 2                  | 3 | 4  | 9     | 0.508             | 0.610              | 0.604               | 180.0    | 2      |
| 2                  | 3 | 4  | 5     | 0.353             | 0.418              | 0.420               | 180.0    | 2      |
| 3                  | 3 | 4  | 9     | 0.504             | 0.560              | 0.566               | 180.0    | 2      |
| 3                  | 3 | 4  | 5     | 0.307             | 0.365              | 0.367               | 180.0    | 2      |
| 2                  | 3 | 3  | 2     | 0.241             | 0.291              | 0.265               | 180.0    | 2      |
| 2                  | 3 | 3  | 4     | 0.279             | 0.295              | 0.290               | 180.0    | 2      |
| 4                  | 3 | 3  | 4     | 0.256             | 0.231              | 0.257               | 180.0    | 2      |
| 9                  | 4 | 5  | 6     | 0.506             | 0.592              | 0.558               | 180.0    | 2      |
| 9                  | 4 | 5  | 5     | 0.497             | 0.584              | 0.539               | 180.0    | 2      |
| 3                  | 4 | 5  | 6     | 0.357             | 0.385              | 0.376               | 180.0    | 2      |
| 3                  | 4 | 5  | 5     | 0.283             | 0.386              | 0.372               | 180.0    | 2      |
| 4                  | 5 | 6  | 10    | 0.471             | 0.594              | 0.569               | 180.0    | 2      |
| 4                  | 5 | 6  | 5     | 0.327             | 0.396              | 0.391               | 180.0    | 2      |
| 5                  | 5 | 6  | 10    | 0.467             | 0.565              | 0.542               | 180.0    | 2      |
| 5                  | 5 | 6  | 5     | 0.257             | 0.379              | 0.370               | 180.0    | 2      |
| 4                  | 5 | 5  | 4     | 0.211             | 0.271              | 0.264               | 180.0    | 2      |
| 4                  | 5 | 5  | 6     | 0.256             | 0.260              | 0.270               | 180.0    | 2      |
| 6                  | 5 | 5  | 6     | 0.223             | 0.248              | 0.265               | 180.0    | 2      |

**Table S2.** The electron couplings for ET and HT reactions based on the optimized neutral supercells and containing electron/hole supercells.

The sizes of supercells are defined in main text. The electron couplings are calculated by isolated orbitals methods as our previous paper[1, 2]. The P1 , P2 and P3 pathways are the same directions described in Figure 4 of main text. The optimized center-to-center distances of the closest channels in ab-plane of crystals also are listed in Å.

|     |    | H <sub>AD</sub>  (meV) |                       |                   |                       | Distance(Å) |      |      |
|-----|----|------------------------|-----------------------|-------------------|-----------------------|-------------|------|------|
|     |    | Hole <sup>a</sup>      | electron <sup>a</sup> | hole <sup>b</sup> | electron <sup>c</sup> | Neutral     | HT   | ET   |
| NAP | P1 | 19.7                   | 47.8                  | 14.6              | 39.8                  | 5.03        | 5.08 | 5.18 |
|     | P2 | 19.7                   | 47.8                  | 15.1              | 40.8                  | 5.03        | 5.10 | 5.02 |
|     | P3 | 44.1                   | 30.2                  | 43.9              | 30.7                  | 5.94        | 5.97 | 5.95 |
| PEN | P1 | 102.2                  | 102.9                 | 84.7              | 67.5                  | 4.69        | 4.75 | 5.05 |
|     | P2 | 35.1                   | 46.6                  | 18.8              | 35.2                  | 6.24        | 6.38 | 6.47 |
|     | P3 | 59.5                   | 103.6                 | 72.4              | 77.2                  | 5.16        | 5.35 | 5.34 |
| PFN | P1 | 33.9                   | 29.4                  | 12.4              | 42.2                  | 5.00        | 5.09 | 4.96 |
|     | P2 | 5.22                   | 19.4                  | 12.4              | 8.2                   | 6.49        | 6.82 | 6.29 |
|     | P3 | 5.22                   | 19.5                  | 7.5               | 17.3                  | 6.49        | 6.76 | 6.40 |
| PFP | P1 | 155.9                  | 93.9                  | 80.3              | 129.2                 | 4.49        | 4.67 | 4.43 |
|     | P2 | 1.9                    | 3.1                   | 4.7               | 3.8                   | 6.15        | 6.14 | 6.24 |
|     | P3 | 1.9                    | 3.1                   | 3.6               | 2.6                   | 6.15        | 6.16 | 6.23 |

<sup>a</sup>, <sup>b</sup> and <sup>c</sup> mean that H<sub>ADS</sub> are calculated on the basis of optimized supercells in neutral, hole-transfer and electron-transfer states, respectively.

**Table S3. Electron-vibration couplings for some significant vibrations whose  $\lambda_i > 5\text{cm}^{-1}$  during ET and HT processes in NAP molecule.**

| HT         | Netrual     | HT         | Cation      | ET         | Neutral     | ET         | Anion       |
|------------|-------------|------------|-------------|------------|-------------|------------|-------------|
| $\omega_i$ | $\lambda_i$ | $\omega_i$ | $\lambda_i$ | $\omega_i$ | $\lambda_i$ | $\omega_i$ | $\lambda_i$ |
| 520        | 23.3        | 515        | 24.7        | 520        | 244.8       | 511        | 235.9       |
| 1184       | 31.3        | 1065       | 14.8        | 773        | 38.3        | 749        | 51.6        |
| 1399       | 274.9       | 1204       | 35.0        | 1184       | 56.7        | 1051       | 19.1        |
| 1490       | 37.6        | 1405       | 352.4       | 1399       | 470.3       | 1157       | 35.6        |
| 1615       | 419.0       | 1500       | 31.5        | 1615       | 299.7       | 1366       | 380.8       |
|            |             | 1623       | 285.6       | 3188       | 6.1         | 1466       | 7.2         |
|            |             |            |             |            |             | 1597       | 303.5       |
|            |             |            |             |            |             | 3141       | 7.8         |

**Table S4.** Electron-vibration couplings for some significant vibrations whose  $\lambda_i > 5\text{cm}^{-1}$  during ET and HT processes in PEN molecule.

| HT         | Netrual     | HT         | Cation      | ET         | Neutral     | ET         | Anion       |
|------------|-------------|------------|-------------|------------|-------------|------------|-------------|
| $\omega_i$ | $\lambda_i$ | $\omega_i$ | $\lambda_i$ | $\omega_i$ | $\lambda_i$ | $\omega_i$ | $\lambda_i$ |
| 264        | 8.3         | 263        | 8.0         | 264        | 164.1       | 263        | 145.1       |
| 1019       | 6.6         | 1039       | 4.3         | 616        | 28          | 616        | 27.0        |
| 1184       | 15.7        | 1196       | 26.8        | 762        | 10.3        | 753        | 8.8         |
| 1207       | 59.6        | 1218       | 57.0        | 1184       | 26.2        | 796        | 5.9         |
| 1411       | 110.7       | 1329       | 6.0         | 1207       | 71.2        | 1170       | 26.4        |
| 1435       | 15.5        | 1411       | 4.5         | 1411       | 154.5       | 1208       | 60.6        |
| 1558       | 136.2       | 1427       | 139.9       | 1435       | 47.8        | 1312       | 7.0         |
| 1577       | 20.6        | 1549       | 81.9        | 1493       | 6.5         | 1393       | 8.9         |
|            |             | 1578       | 55.5        | 1558       | 25.3        | 1411       | 199.9       |
|            |             |            |             | 1577       | 11.1        | 1535       | 33.4        |
|            |             |            |             |            |             | 1564       | 8.6         |

**Table S5.** Electron-vibration couplings for some significant vibrations whose  $\lambda_i > 5\text{cm}^{-1}$  during ET and HT processes in PFN molecule.

| HT         | Netrual     | HT         | Cation      | ET         | Neutral     | ET         | Anion       |
|------------|-------------|------------|-------------|------------|-------------|------------|-------------|
| $\omega_i$ | $\lambda_i$ | $\omega_i$ | $\lambda_i$ | $\omega_i$ | $\lambda_i$ | $\omega_i$ | $\lambda_i$ |
| 277        | 21.6        | 278        | 14.6        | 277        | 2.0         | 269        | 4.6         |
| 296        | 16.8        | 296        | 17.8        | 296        | 183         | 288        | 160.6       |
| 390        | 36.5        | 390        | 37.8        | 390        | 155.3       | 381        | 144.7       |
| 511        | 132.3       | 513        | 128.3       | 511        | 321.1       | 498        | 333.7       |
| 1083       | 52.6        | 1113       | 51.7        | 1083       | 8.8         | 1035       | 1.6         |
| 1252       | 142.6       | 1300       | 128         | 1252       | 283.8       | 1194       | 248.4       |
| 1386       | 54          | 1400       | 240.2       | 1386       | 894.5       | 1373       | 585.6       |
| 1531       | 358         | 1571       | 774.9       | 1531       | 230.4       | 1504       | 105.7       |
| 1653       | 917.8       | 1644       | 333         | 1653       | 99.2        | 1658       | 458.4       |

**Table S6.** Electron-vibration couplings for some significant vibrations whose  $\lambda_i > 5\text{cm}^{-1}$  during ET and HT processes in PFP molecule.

| HT         | Netrual     | HT         | Cation      | ET         | Neutral     | ET         | Anion       |
|------------|-------------|------------|-------------|------------|-------------|------------|-------------|
| $\omega_i$ | $\lambda_i$ | $\omega_i$ | $\lambda_i$ | $\omega_i$ | $\lambda_i$ | $\omega_i$ | $\lambda_i$ |
| 177        | 3.7         | 177        | 3.3         | 177        | 131.3       | 176        | 128.5       |



|      |       |      |       |      |       |      |       |
|------|-------|------|-------|------|-------|------|-------|
| 281  | 5.2   | 282  | 5     | 281  | 19.3  | 278  | 21.1  |
| 492  | 76.9  | 494  | 76.6  | 344  | 8.7   | 344  | 8.8   |
| 706  | 28    | 712  | 29.3  | 454  | 10.4  | 451  | 12.9  |
| 1019 | 12.5  | 1027 | 15.2  | 492  | 14.3  | 487  | 10.4  |
| 1121 | 9.3   | 1149 | 9.4   | 706  | 11.1  | 697  | 13.3  |
| 1257 | 130.2 | 1285 | 176.3 | 1019 | 14    | 989  | 10.3  |
| 1363 | 100.1 | 1377 | 144   | 1121 | 6.3   | 1090 | 6.8   |
| 1401 | 75.4  | 1411 | 19.5  | 1222 | 10.3  | 1196 | 7.3   |
| 1503 | 71.5  | 1445 | 33.3  | 1257 | 233.2 | 1227 | 224.6 |
| 1572 | 90.4  | 1520 | 40.2  | 1363 | 448.6 | 1367 | 279.7 |
| 1628 | 344.6 | 1554 | 80.6  | 1401 | 21.9  | 1396 | 168.6 |
|      |       | 1620 | 333   | 1503 | 22.3  | 1442 | 5.4   |
|      |       |      |       | 1572 | 10.5  | 1514 | 43    |
|      |       |      |       | 1628 | 30.8  | 1546 | 8.6   |
|      |       |      |       |      |       | 1604 | 12.8  |

**Table S7.** The effective vibration frequency and its Huang-Ryhs factors for ET and HT reactions under the one-mode approximation.

$$\omega_{\text{eff}} = \sum \omega_i S_i / \sum S_i$$

$$S_{\text{eff}} = \lambda_{\text{int}} / \hbar \omega_{\text{eff}} \quad \lambda_{\text{int}} = \sum \hbar \omega_i S_i$$

|     | Hole                                  |                  |                                    | electron                              |                  |                                    |
|-----|---------------------------------------|------------------|------------------------------------|---------------------------------------|------------------|------------------------------------|
|     | $\omega_{\text{eff}}(\text{cm}^{-1})$ | $S_{\text{eff}}$ | $\lambda_{\text{int}}(\text{meV})$ | $\omega_{\text{eff}}(\text{cm}^{-1})$ | $S_{\text{eff}}$ | $\lambda_{\text{int}}(\text{meV})$ |
| NAP | 1412                                  | 1.1              | 191.1                              | 1008                                  | 2.2              | 268.7                              |
| PEN | 1328                                  | 0.58             | 95.6                               | 622                                   | 1.7              | 134.3                              |
| PFN | 1172                                  | 2.95             | 429.4                              | 794                                   | 5.32             | 523.4                              |
| PFP | 1175                                  | 1.63             | 238.1                              | 660                                   | 2.98             | 243.6                              |

**Table S8.** The reorganization energies including internal and external contributions for different CT channels.

|     |    | $\lambda_{\text{int}}(\text{meV})$ |          | $\lambda_{\text{ext}}(\text{meV})$ |          | $\lambda_{\text{tot}}(\text{meV})$ |          |
|-----|----|------------------------------------|----------|------------------------------------|----------|------------------------------------|----------|
|     |    | Hole                               | Electron | hole                               | electron | hole                               | electron |
| NAP | P1 | 197.6                              | 243.6    | 29.9                               | 226.8    | 227.4                              | 470.4    |
|     | P2 | 198.7                              | 247.2    | 35.8                               | 224.8    | 234.5                              | 472.0    |
|     | P3 | 198.6                              | 246.9    | 25.8                               | 251.3    | 224.4                              | 498.2    |
| PEN | P1 | 115.3                              | 132.8    | 31.1                               | 219.0    | 146.5                              | 351.8    |
|     | P2 | 113.1                              | 137.5    | 50.4                               | 214.3    | 163.4                              | 351.8    |
|     | P3 | 112.1                              | 141.9    | 15.3                               | 225.8    | 127.4                              | 367.7    |
| PFN | P1 | 443.6                              | 511.6    | 71.2                               | 21.2     | 514.8                              | 532.8    |
|     | P2 | 447.8                              | 516.6    | 119.9                              | 55.5     | 567.7                              | 572.2    |

|     |    |       |       |       |       |       |       |
|-----|----|-------|-------|-------|-------|-------|-------|
|     | P3 | 444.4 | 511.6 | 126.3 | 58.7  | 570.7 | 570.3 |
| PFP | P1 | 277.5 | 272.4 | 161.9 | 131.2 | 439.4 | 403.6 |
|     | P2 | 272.6 | 279.0 | 157.6 | 143.0 | 430.2 | 422.0 |
|     | P3 | 276.7 | 294.3 | 137.1 | 122.9 | 413.8 | 417.2 |

1. Yin, S. and Y. Lv, *Modeling hole and electron mobilities in pentacene ab-plane*. *Organic Electronics*, 2008. **9**(5): p. 852-858.
2. Yin, S., et al., *Challenges for the Accurate Simulation of Anisotropic Charge Mobilities through Organic Molecular Crystals: The bet-Phase of mer-Tris(8-hydroxyquinolino)aluminum(III) (Alq3) Crystal*. *The Journal of Physical Chemistry C*, 2012. **116**(28): p. 14826-14836.
